# Supplementary material for: Pro-Cellular Exhaustion Markers are Associated with Splenic Microarchitecture Disorganization and Parasite Load in Dogs with Visceral Leishmaniasis
Source: PubMed Central journal article supplement (PMC6736856; doi:10.1038/s41598-019-49344-1), 2019-09-10

**Pro-cellular exhaustion markers are associated with splenic microarchitecture disorganization and parasite load in dogs with visceral leishmaniasis**

Tainã Luís de Souza<sup>1</sup>, Aurea Virginia Andrade da Silva<sup>1</sup>, Luiza de Oliveira Ramos Pereira<sup>1</sup>, Fabiano Borges Figueiredo<sup>2</sup>, Artur Augusto Velho Mendes Junior<sup>3</sup>, Rodrigo Caldas Menezes<sup>3</sup>, Daniella Areas Mendes-da-Cruz<sup>4</sup>, Mariana Côrtes Boité<sup>1</sup>, Elisa Cupolillo<sup>1</sup>, Renato Porrozi<sup>1</sup>, Fernanda Nazaré Morgado<sup>1</sup>

<sup>1</sup> Laboratório de Pesquisa em Leishmaniose, Instituto Oswaldo Cruz, Fundação Oswaldo Cruz, Rio de Janeiro, Brazil.

<sup>2</sup> Laboratório de Biologia Celular, Instituto Carlos Chagas, Fundação Oswaldo Cruz, Paraná, Brazil.

<sup>3</sup> Laboratório de Pesquisa Clínica em Dermatozoonoses em Animais Domésticos, Instituto Nacional de Infectologia Evandro Chagas, Fundação Oswaldo Cruz, Rio de Janeiro, Brazil.

<sup>4</sup> Laboratório de Pesquisas Sobre o Timo, Instituto Oswaldo Cruz, Fundação Oswaldo Cruz, Rio de Janeiro, Brazil.

### Supplementary Table 1

Target genes and their sequences used in quantification of the parasite load. S, sense; AS, antisense, bp, base pairs

| Target Gene                | Access number or reference |    | Sequence (5'-3')     | Base pair size (bp) |
|----------------------------|----------------------------|----|----------------------|---------------------|
| HPRT<br>Canine target      | NW_003726126.<br>1         | S  | AAAACAATGCAGACTTTGCT | 58                  |
|                            |                            | AS | CCTTGACCATCTTTGGATTA |                     |
| SsrRNA<br>Parasite target  | Prina et al.<br>(2007)     | S  | TACTGGGGCGTCAGAG     | 153                 |
| <i>Leishmania infantum</i> | (L).                       | AS | GGGTGTCATCGTTTGC     |                     |

## Supplementary Table 2

Target genes and primer design for cDNA. S, sense; AS, antisense, bp, base pairs

| Target gene | Access number  |    | Sequence (5'-3')      | Base pair size (bp) |
|-------------|----------------|----|-----------------------|---------------------|
| HPRT        | NW_003726126.1 | S  | AAAACAATGCAGACTTTGCT  | 58                  |
|             |                | AS | CCTTGACCATCTTTGGATTA  |                     |
| GAPDH       | XM_003434387.2 | S  | ATGCCCAACATTGGTTATGG  | 103                 |
|             |                | AS | CTCTTTCCACGATGGCTTTG  |                     |
| PD-1        | XM_022409577.1 | S  | TCCACGAACACTCAGAAGCC  | 136                 |
|             |                | AS | TTCCTACTCCCCTTCAGGCA  |                     |
| PD-L1       | AB_850883.1    | S  | CCGCCAGCAGGTCACTTC    | 139                 |
|             |                | AS | CCATTGTCACATTGCCACCA  |                     |
| PD-L2       | XM_014117874.2 | S  | CCTTGAAGTGGTGTGGCAGA  | 132                 |
|             |                | AS | TGCACTCCCAGGCTCAAAT   |                     |
| LAG-3       | XM_005637438.2 | S  | AGTCATCACAGTGAAGTCCCA | 132                 |
|             |                | AS | GAACCTCGCCAAGACTGCTT  |                     |

## Supplementary Figure S1

**Representative images of the splenic white pulp (SWP) of dogs naturally infected with *L. infantum*. (A) Organized SWP, (B) slightly disorganized SWP, (C), SWP with medium disorganization, and (D), intensely disorganized SWP. Scale bar 10  $\mu$ m. SWP = Splenic White Pulp; GC = Germinal Centre; CA = Central Artery; PLS = Periarteriolar Lymphatic Sheath; and SRP = Splenic Red Pulp. (E) Clinical score observed according to the degree of organization of the SWP. Mann-Whitney test: \* $p=0,0235$ . (F) Quantitative analysis of the dogs in the different groups according to the clinical score and splenic disorganization/parasite load. Organized SWP: Animals with SWP organized to slightly disorganized. SWP disorganized: animals with medium to intense disorganization of the SWP.**

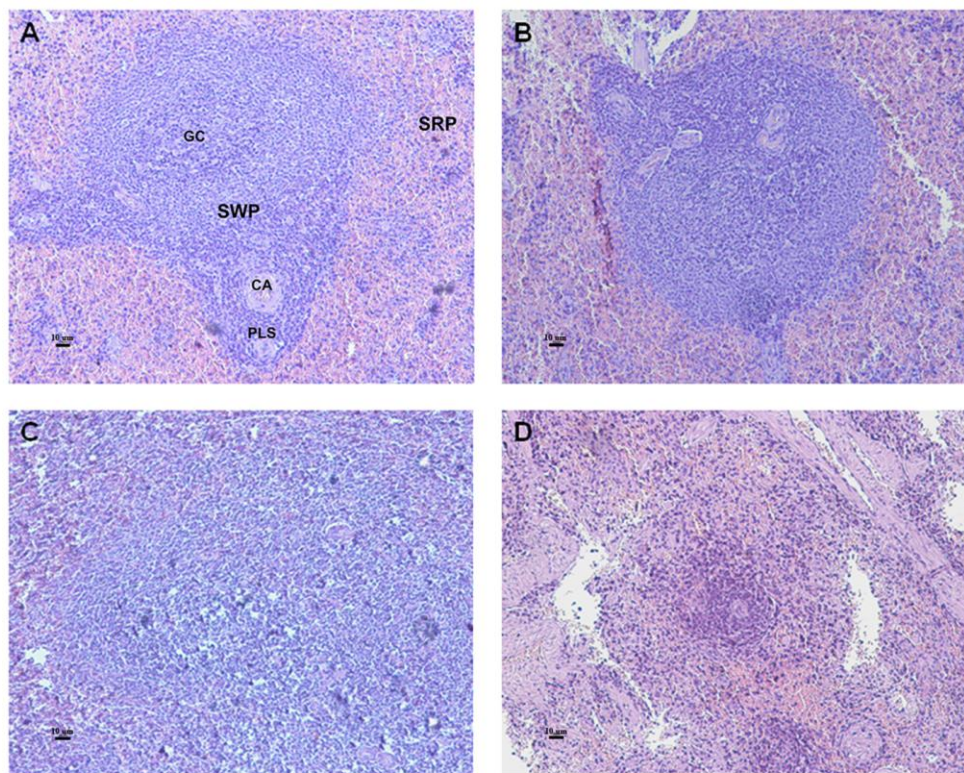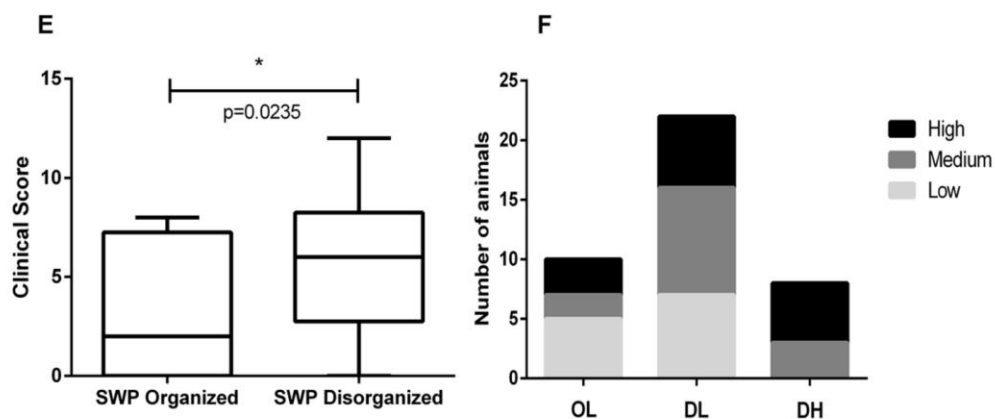

## Supplementary Figure S2

Cell profile observed in the spleen of dogs naturally infected with *L. infantum* according to the clinical score: (A) percentage of CD4<sup>+</sup> cells, (B) CD4<sup>+</sup> cells/mm<sup>2</sup>, (C) percentage of CD8<sup>+</sup> cells, (D) CD8<sup>+</sup> cells/mm<sup>2</sup>, (E) percentage of CD21<sup>+</sup> cells and (F) CD21<sup>+</sup> cells/mm<sup>2</sup>. Mann-Whitney and Kruskal-Wallis tests:  $p > 0.05$ .

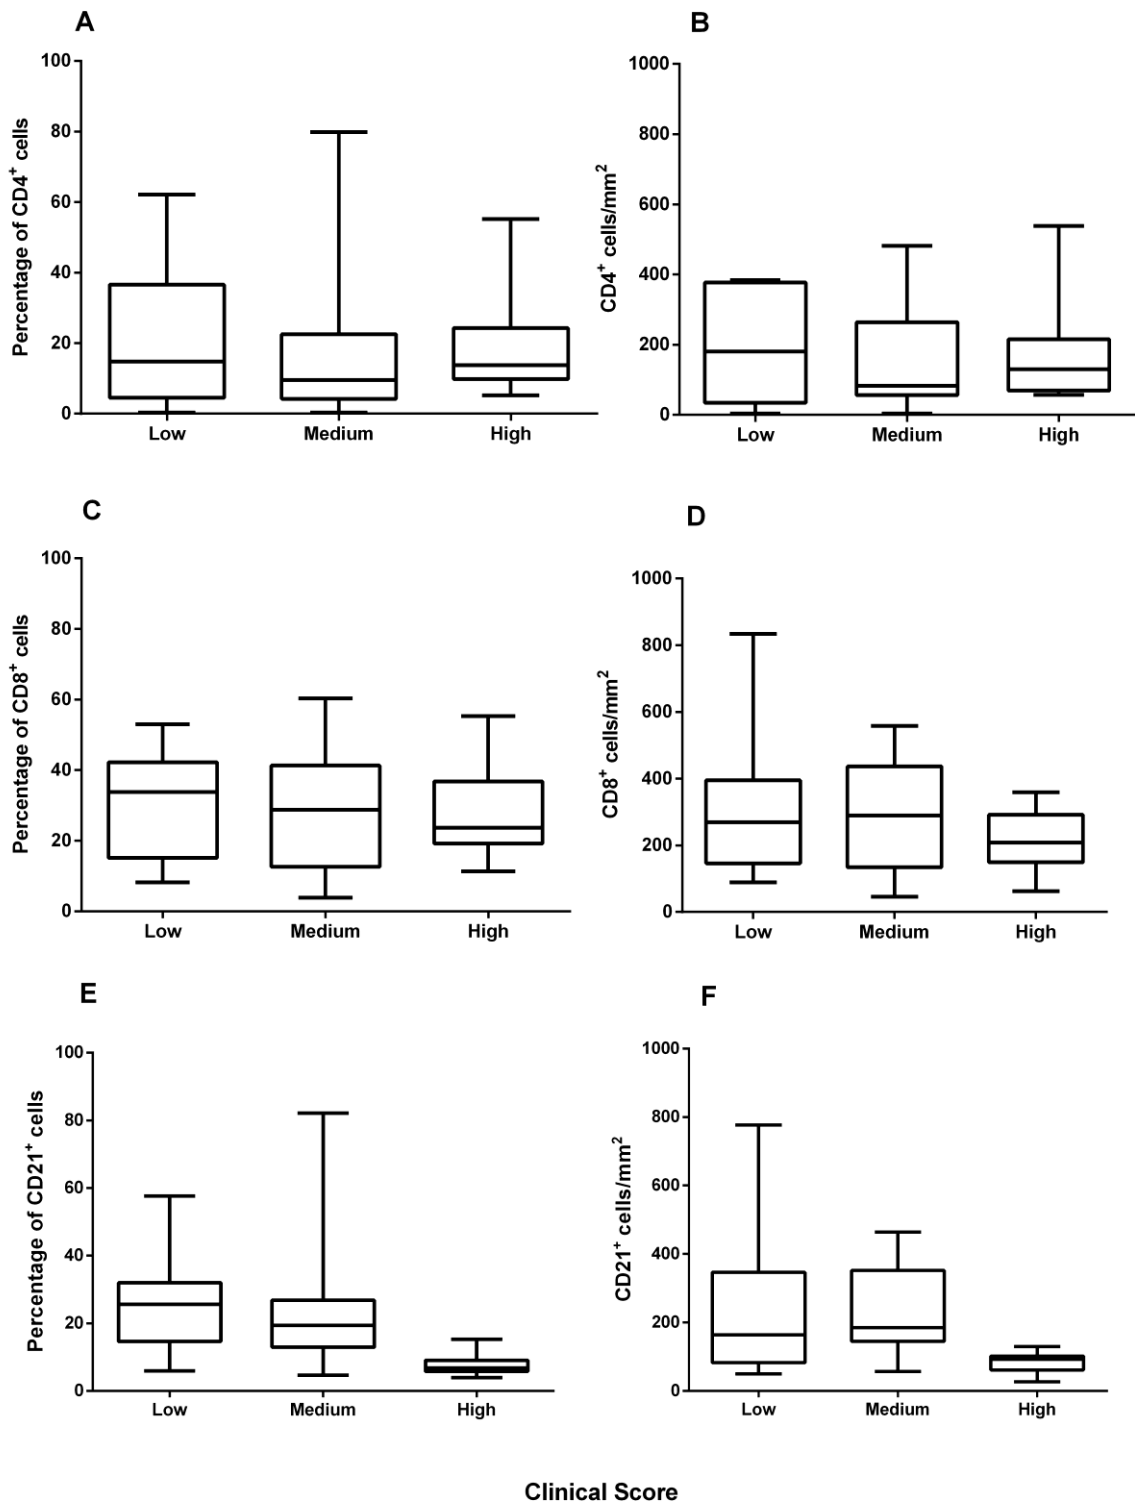

### Supplementary Figure S3

Cell profile observed in the spleen of dogs naturally infected by *L. infantum* grouped according to the disorganization of the white splenic pulp and the parasite load: (A) percentage of IFN- $\gamma$ <sup>+</sup> cells, (B) IFN- $\gamma$ <sup>+</sup>/mm<sup>2</sup> cells, (C) percentage of IL-10<sup>+</sup> cells, (D) IL-10<sup>+</sup> cells/mm<sup>2</sup>, (E) percentage of Ki-67<sup>+</sup> cells, and (F) Ki-67<sup>+</sup> cells/mm<sup>2</sup>. Mann-Whitney and Kruskal-Wallis tests:  $p > 0.05$ .

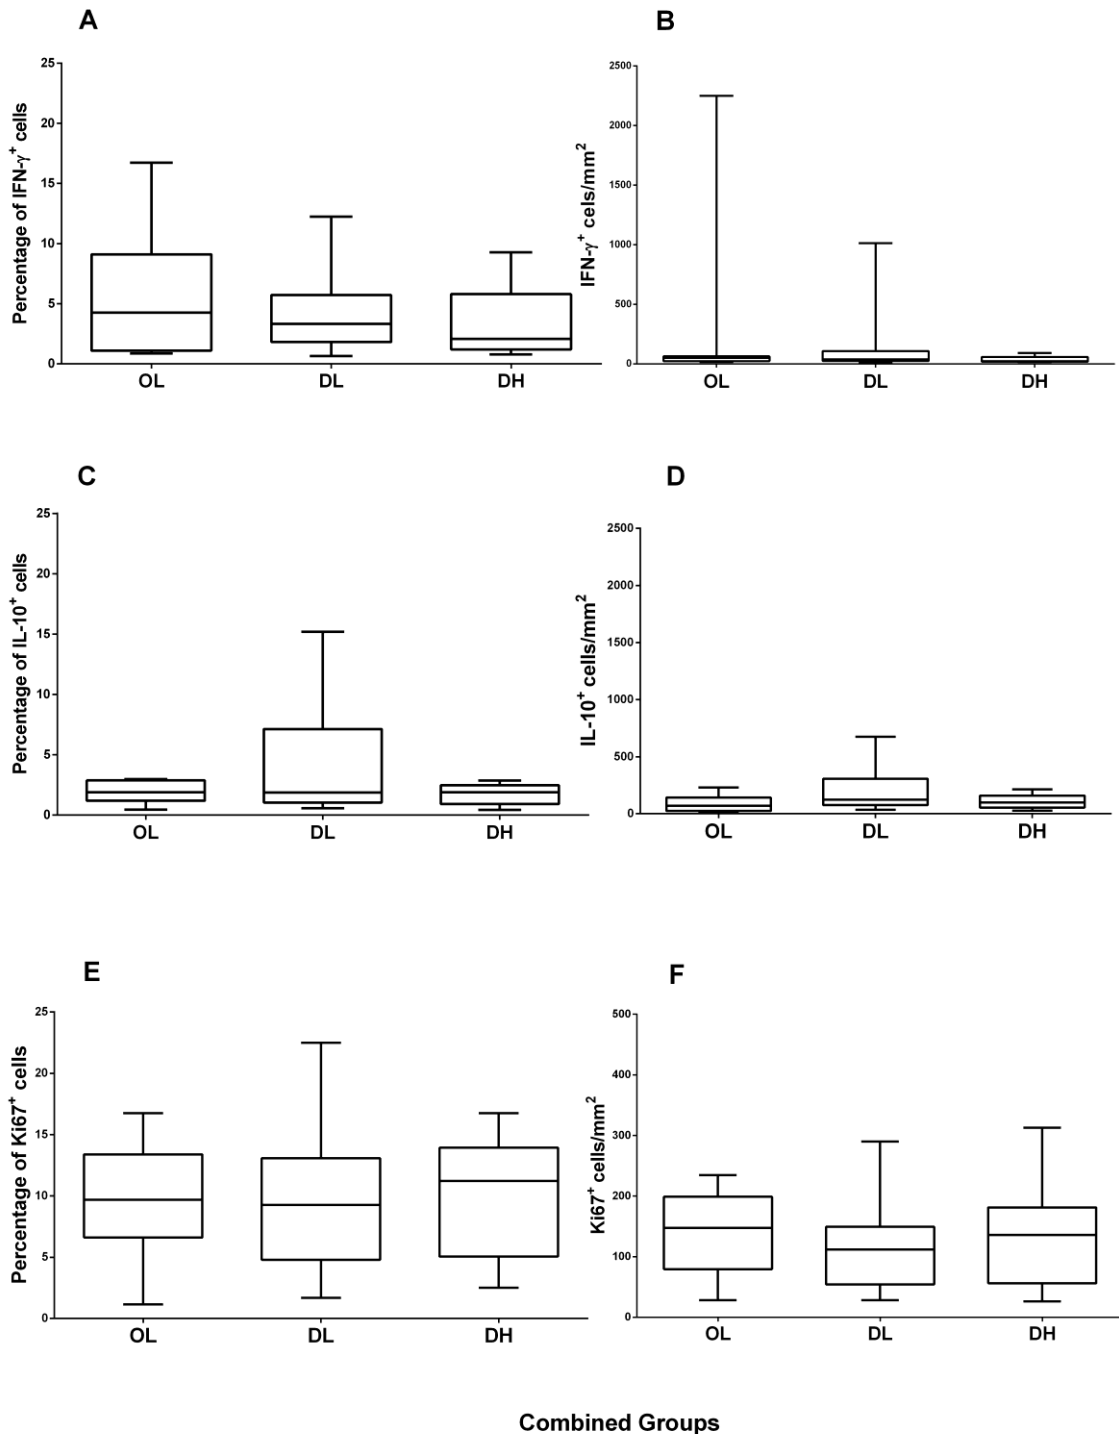

## Supplementary Figure S4

Cellular exhaustion profile observed in the spleen of dogs naturally infected with *L. infantum* according to the clinical score: (A) percentage of TIM-3<sup>+</sup> cells, (B) TIM-3<sup>+</sup>/mm<sup>2</sup>, (C) percentage of CTLA-4<sup>+</sup> cells, and (D) CTLA-4<sup>+</sup> cells/mm<sup>2</sup>. Mann-Whitney and Kruskal-Wallis tests: p>0.05.

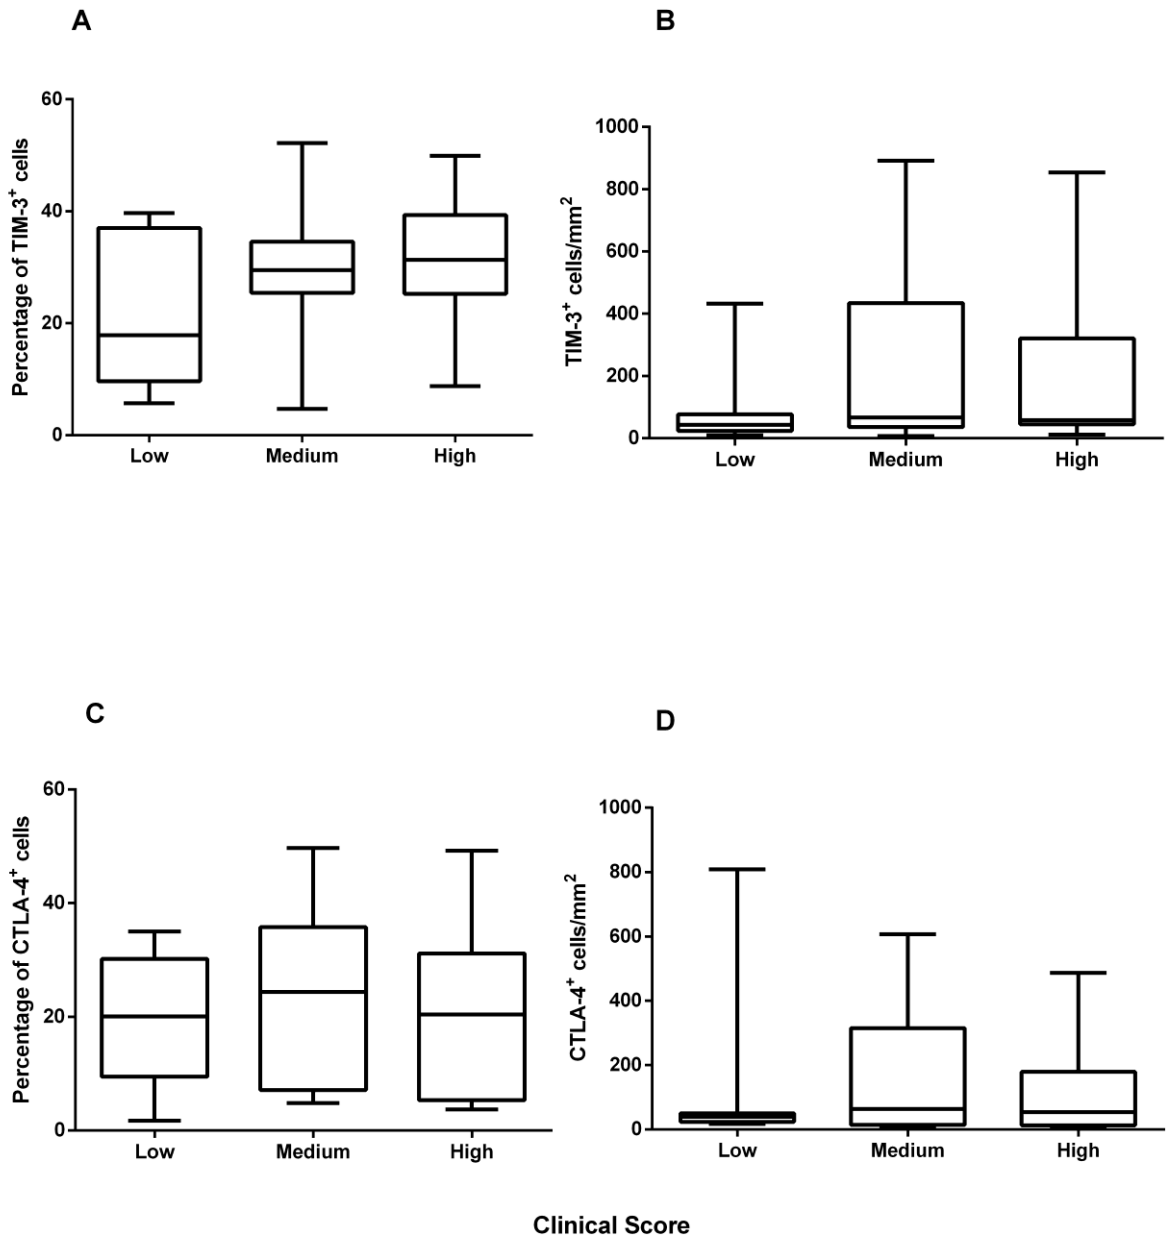

## Supplementary Figure S5

**Quantitative analysis by flow cytometry of CD4<sup>+</sup> and CD8<sup>+</sup> subpopulations expressing the exhaustion receptors TIM-3 and CTLA-4. (A)** Representative images of lymphocyte gates, histograms of CTLA-4- and TIM-3-positive cells. **(B)** Percentage of CD4<sup>+</sup> cells, **(C)** CD4<sup>+</sup>CTLA-4<sup>+</sup> cells, **(D)** CD4<sup>+</sup>TIM-3<sup>+</sup> cells, **(E)** CD8<sup>+</sup> cells, **(F)** CD8<sup>+</sup>CTLA-4<sup>+</sup> cells, **(G)** CD8<sup>+</sup>TIM-3<sup>+</sup> cells among groups. OL: organized SWP and low parasite load; DL: disorganized SWP and low parasite load; DH: disorganized SWP and high parasite load.

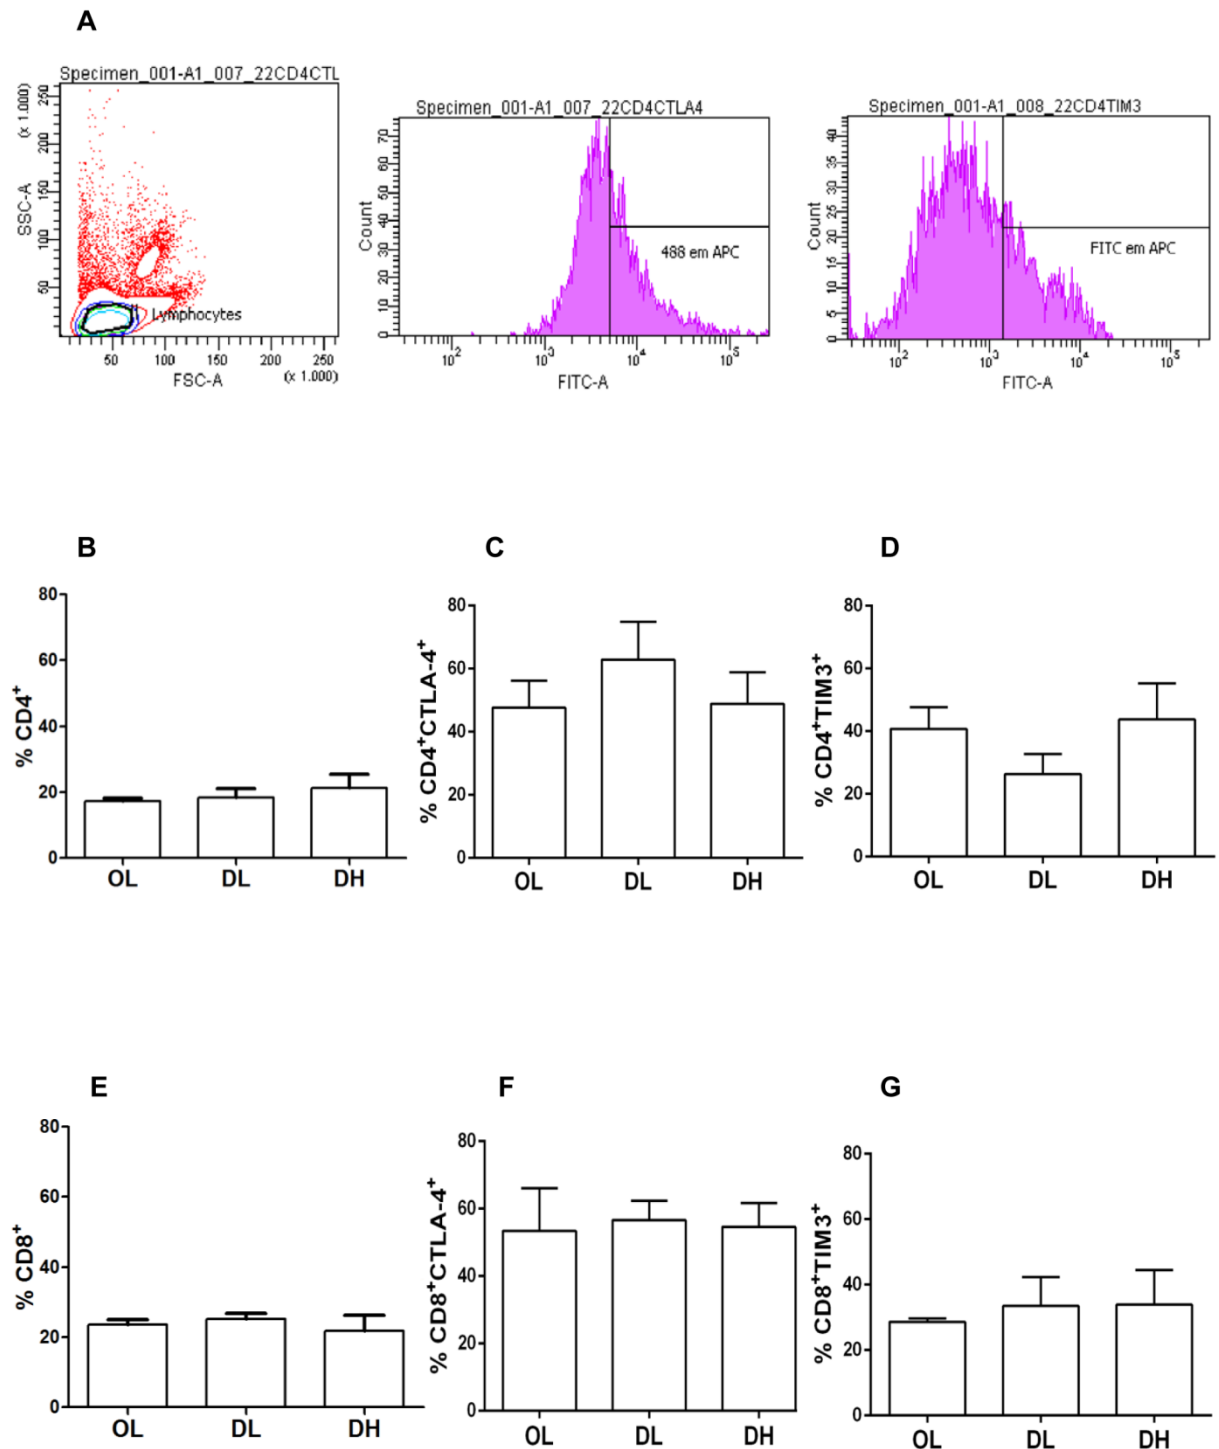

Supplement: 41598_2019_49344_MOESM1_ESM.pdf [file 41598_2019_49344_MOESM1_ESM.pdf]
